# Supplementary figures and images for: Structure and conductivity of Nd6MoO12-based potential electron–proton conductors under dry and wet redox conditions
Source: Royal Society of Chemistry journal article supplement (doi:10.1039/c8qi01142g), 2019-01-01

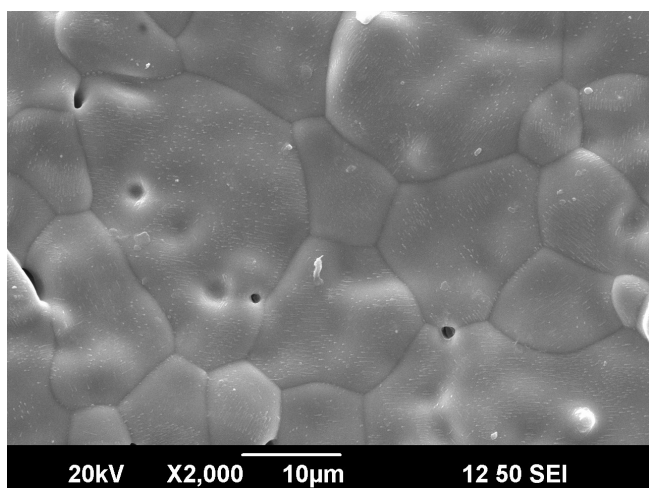

Fig.S1

Microstructure of  $\text{Nd}_{10}\text{Mo}_2\text{O}_{21}$  ( $T_{\text{syn}} = 1600^\circ\text{C}$ ).

Supplement: c8qi01142g1.pdf [file c8qi01142g1.pdf]
